# Supplementary material
Source: publisher figshare collection journal article supplement (https://acs.figshare.com/ndownloader/files/4200247)
Supplement: Supplementary file 1 [file 4200247]

**Supporting Information for**  
**[Cp\*Ru(CO)<sub>2</sub>]<sub>2</sub>-Catalyzed Hydrodeoxygenation**  
**and Hydrocracking of Diols and Epoxides**

Sylvain Stanowski<sup>1</sup>, Kenneth M. Nicholas<sup>2</sup> and Radhey S. Srivastava<sup>1\*</sup>

<sup>1</sup>Department of Chemistry, University of Louisiana at Lafayette, LA 70504

<sup>2</sup>Department of Chemistry & Biochemistry, University of Oklahoma, Norman, OK 73019

**List of contents:**

1. Experimental procedure
2. Representative procedure for [Cp\*Ru(CO)<sub>2</sub>]<sub>2</sub>-catalyzed hydrodeoxygenation and hydrocracking of diols and epoxides
3. Analytical methods
4. Isolation of ethyl benzene
5. Recovery of catalyst
6. Reference
7. Representative gas chromatograms of diol deoxydehydrations
8. IR and <sup>1</sup>H-NMR of recovered catalyst
9. <sup>1</sup>H, <sup>13</sup>C-NMR of ethyl benzene

**Experimental Procedure**

**General:** Ruthenium powder (99.95%) was purchased from Strem chemicals. All other chemicals were purchased from Sigma Aldrich. [Cp\*Ru(CO)<sub>2</sub>]<sub>2</sub> was prepared by literature method.<sup>1</sup> All other chemicals were purchased from Sigma Aldrich and used as received. Deoxydehydration reactions were performed in a 100 mL and 50 mL Parr steel autoclave (model 4792) fitted with glass liner.

**Representative Procedure for [Cp\*Ru(CO)<sub>2</sub>]<sub>2</sub>-Catalyzed Hydrodeoxygenation and Hydrocracking of Diols and Epoxides**

In a Parr steel autoclave, [Cp\*Ru(CO)<sub>2</sub>]<sub>2</sub> (0.014 mmol) and diol/epoxide (0.14 mmol) and 5  $\mu$ L dodecane (internal standard) were added to anhydrous benzene (6-10 mL). The autoclave was pressurized to desired pressure (60, 100, 300 psi) with molecular hydrogen and placed on a preheated oil bath to desired temperature (170<sup>o</sup>,

200 °C). The aliquots of samples were withdrawn at desired intervals and analyzed by GC and GC-MS.

### **Analytical methods**

**Gas chromatography.** Gas chromatography was performed with an HP GC system (model series II 5890) with capillary column  $\beta$ -dex (Supelco) an FID detector and with a thermal program of 40 °C (5 min); 10 °/min to 170 °C. Product concentrations were calculated from GC calibration curves (lines) of alkene/dodecane weighed concentrations.

**G.C.- M.S.** GC-MS was performed on Agilent (GC model 7890, MS 5975C VL MSD with triple-axis detector) using a nonpolar Agilent column (model number 19091S-433). Various oven temperature programs were used depending upon the nature of products: i) 35 °C (5 min); 10 °C/min to 170 °C; ii) 40 °C, (5 min); 10 °C/min to 170 °C, and iii) 50 °C (3 min); 10 °C/min to 250 °C then 5 min at 250 °C.

**Isolation of ethyl benzene:** After completion of the reaction, the autoclave was allowed to cool at room temperature. The reaction mixture was purified by column chromatography using hexane as eluent. Since the product (Ethyl benzene, BP: 136 °C) cannot be identified by thin layer chromatography (TLC), all column fractions were subjected for GC analysis to find the product. We combined all the fractions containing product. The solvent was reduced partially under vacuum and the rest is left open at room temperature to minimize the hexane. The left over residue was used for NMR analysis and confirmed the presence of ethyl benzene.

**Recovery of catalyst:** We made an effort to recover Ru-species at the end of reaction. We choose our standard substrate, 1-phenyl-1,2-ethandiol, for the recovery of catalyst at the end of reaction. We isolated black solids at the end of 8h cycle and 24h cycle of reaction. Both materials were washed with acetone followed by diethyl ether and vacuum dried. The material did not show any catalytic activity when subjected to same reaction conditions. IR and <sup>1</sup>H-NMR of this substance is inconclusive.

### **Reference**

1. King R.B.; Iqbal, M.Z.; King Jr., A.D. *J. Organomet. Chem.*, **1979**, 171, 53.

File : C:\msdchem\1\METHODS\Amination1.M\SS-219-30H.D  
Operator : SS  
Acquired : 25 Feb 2011 16:13 using AcqMethod Amination1.M  
Instrument : 5975C  
Sample Name: SS-219-30H  
Misc Info : [CpRu(CO)2]2, 170C, 60PSI  
Vial Number: 1

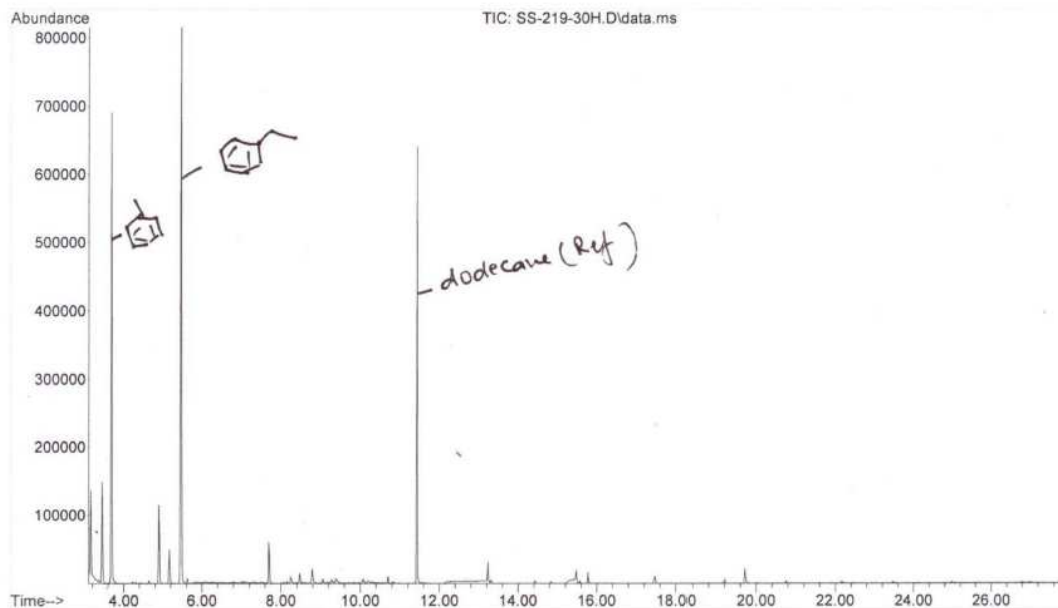

File : C:\msdchem\1\METHODS\Amination1.M\SS-219-30H.D  
Operator : SS  
Acquired : 25 Feb 2011 16:13 using AcqMethod Amination1.M  
Instrument : 5975C  
Sample Name: SS-219-30H  
Misc Info : [CpRu(CO)2]2, 170C, 60PSI  
Vial Number: 1

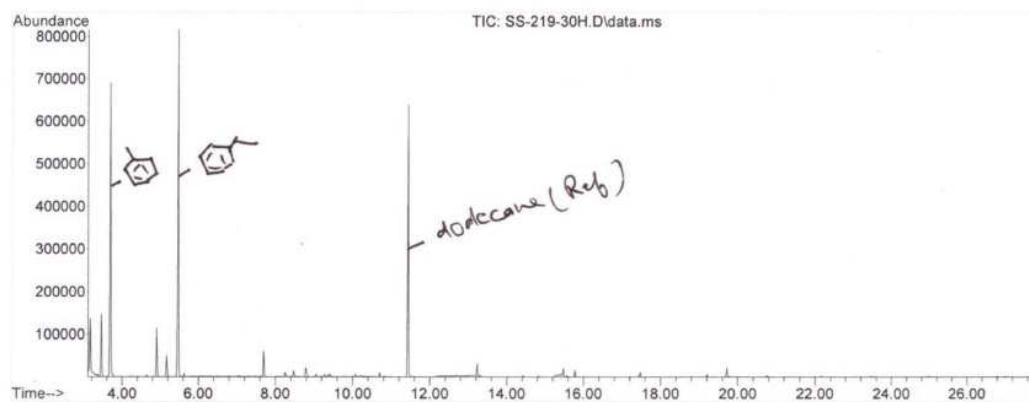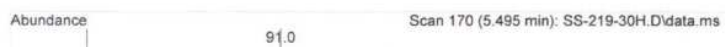

File : C:\msdchem\1\METHODS\Amination1.M\SS-227-23H.D  
Operator : SS  
Acquired : 15 Mar 2011 9:54 using AcqMethod Amination1.M  
Instrument : 5975C  
Sample Name: SS-227-23H  
Misc Info : [Cp\*Ru(CO)2]2, 170C, 60PSI  
Vial Number: 1

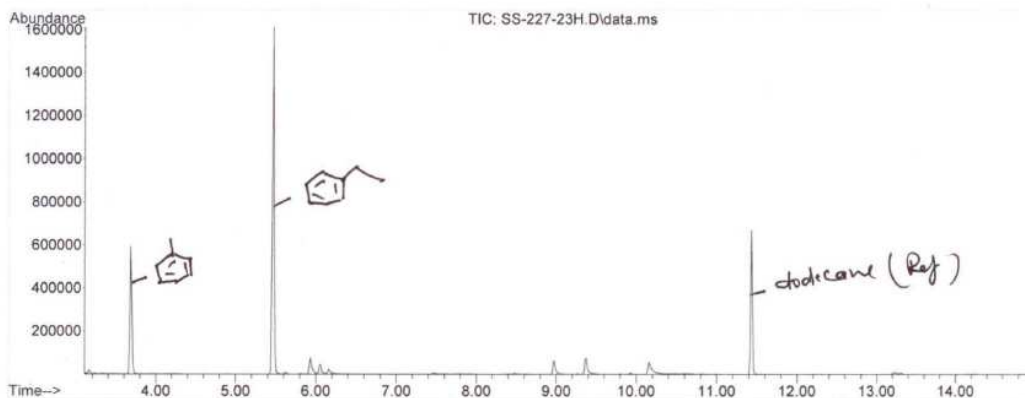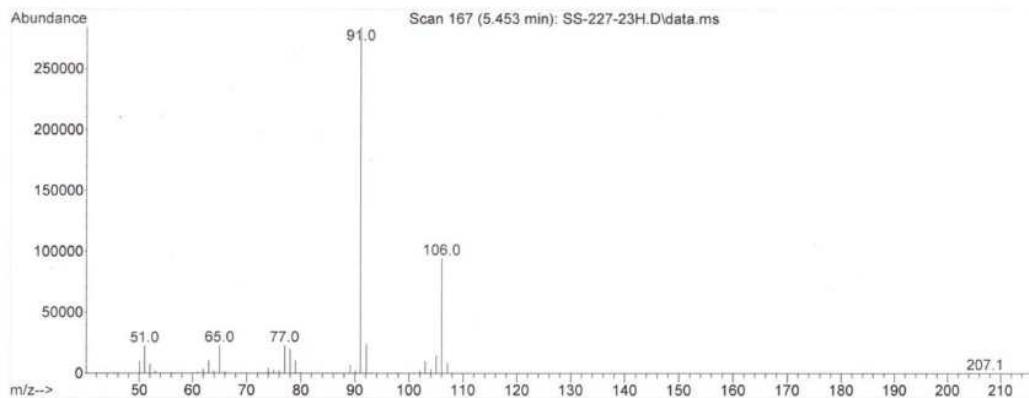

File :C:\msdchem\1\METHODS\Amination1.M\SS-233-8H.D  
Operator : SS  
Acquired : 22 Mar 2011 9:17 using AcqMethod Amination1.M  
Instrument : 5975C  
Sample Name: SS-233-8H  
Misc Info : [Cp\*Ru(CO)2]2, 170C, 60PSI  
Vial Number: 1

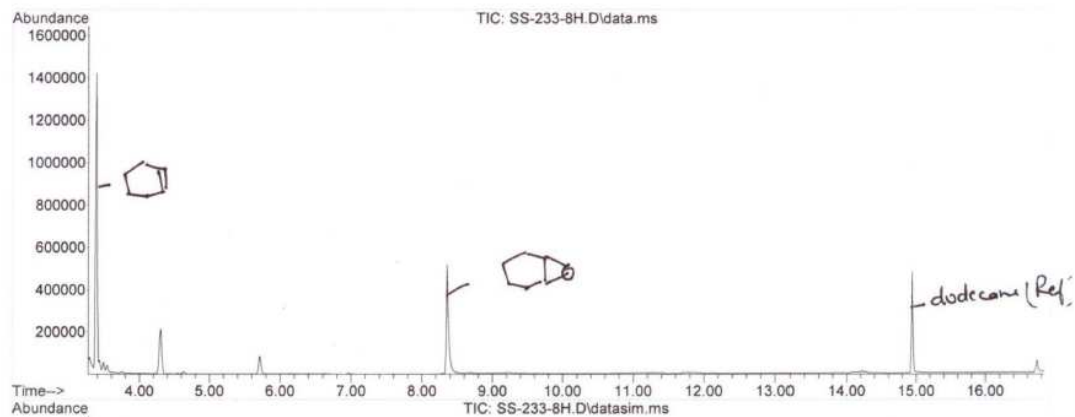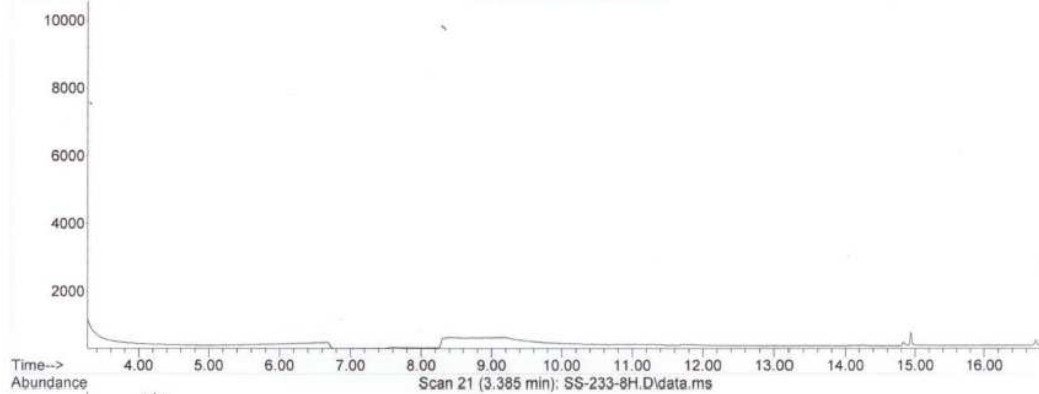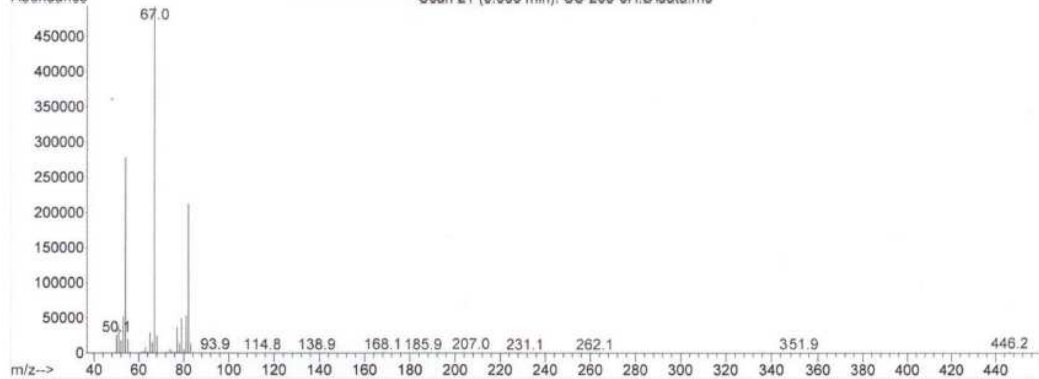

File : C:\msdchem\1\METHODS\Amination1.M\SS-245-23H.D  
Operator : SS  
Acquired : 5 Apr 2011 10:47 using AcqMethod Amination1.M  
Instrument : 5975C  
Sample Name: SS-245-23H  
Misc Info : [Cp\*Ru(CO)2]2, 170C, 300PSI  
Vial Number: 1

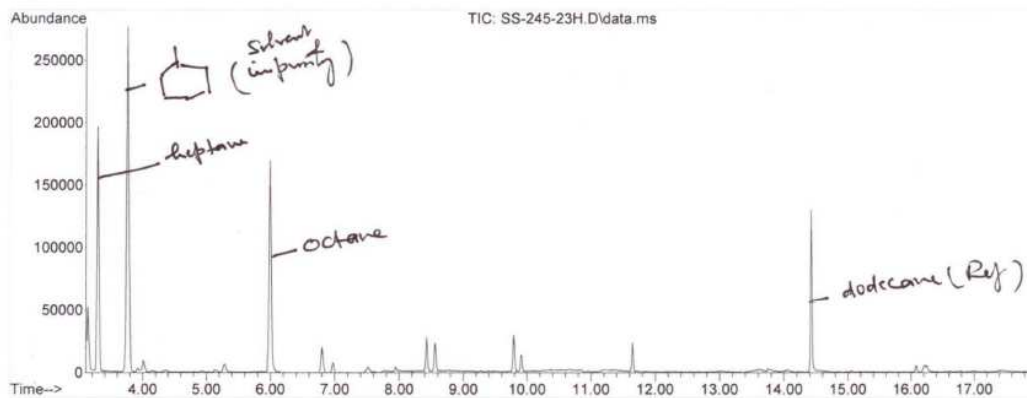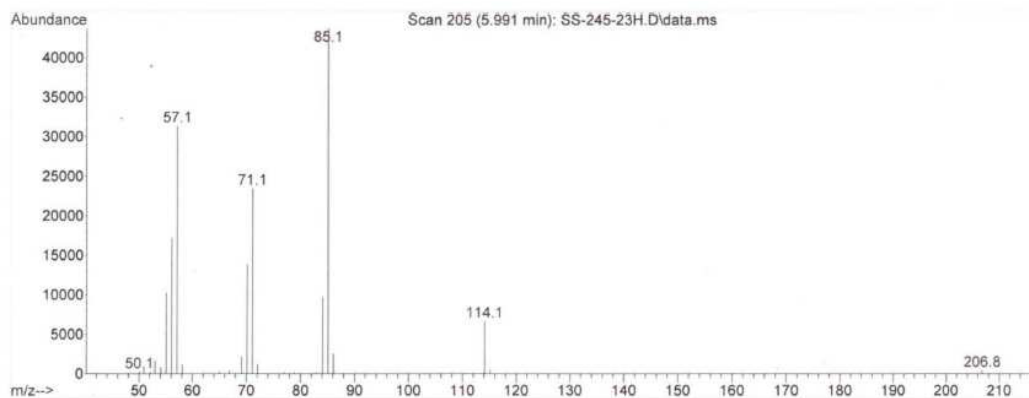

File : C:\msdchem\1\METHODS\Amination1.M\SS-253-49H.D  
Operator : MS  
Acquired : 9 Apr 2011 10:48 using AcqMethod Amination1.M  
Instrument : 5975C  
Sample Name: SS-253-49H  
Misc Info : [Cp\*Ru(CO)2]2, 170C, 100PSI  
Vial Number: 1

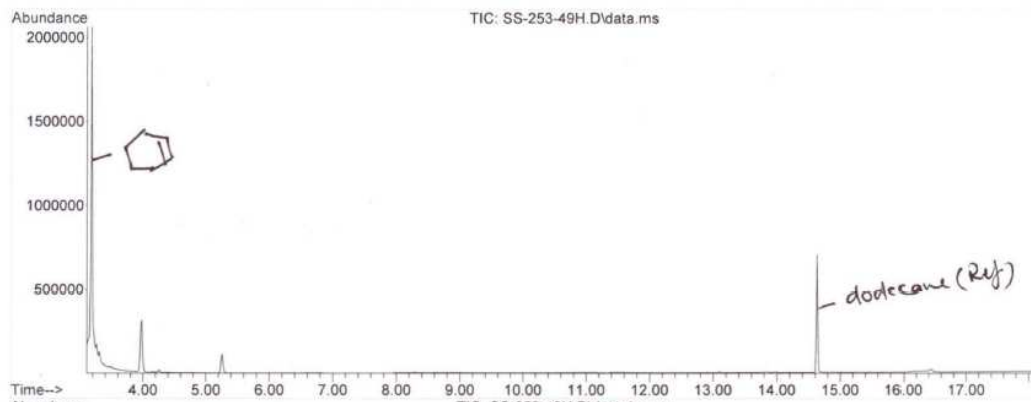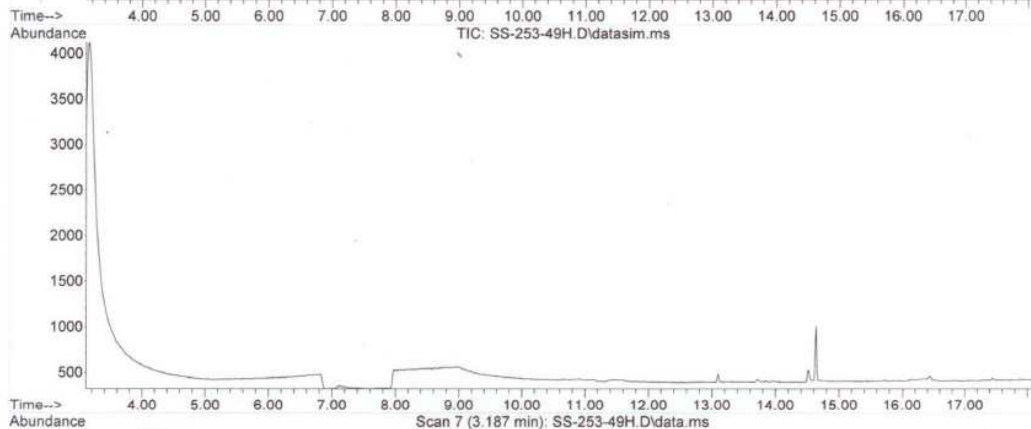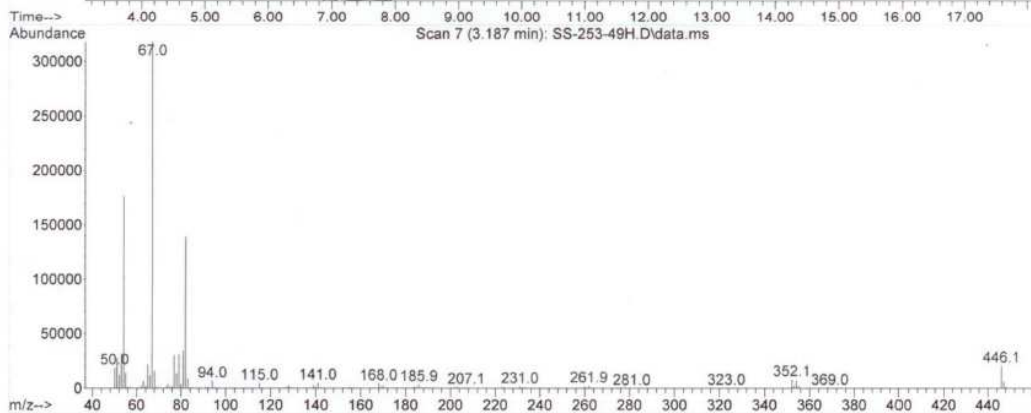



Sample Name: R5884R2-48H  
Met Info :  
Vial Number: 1

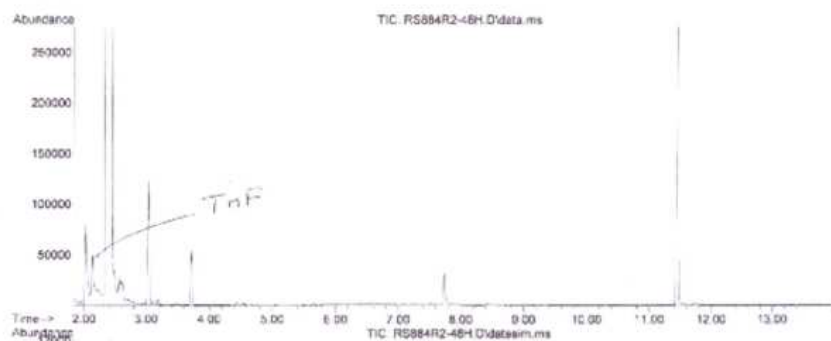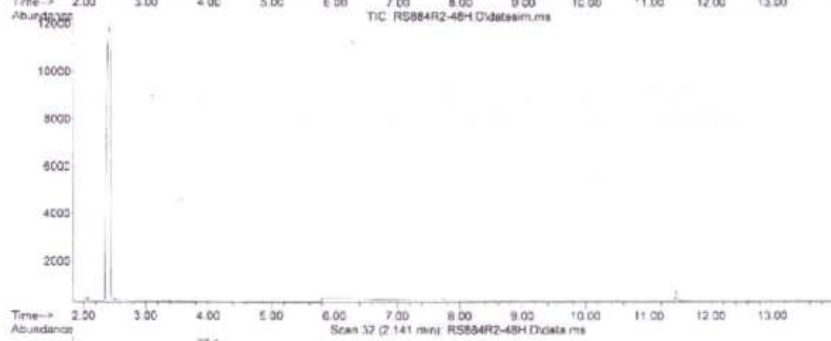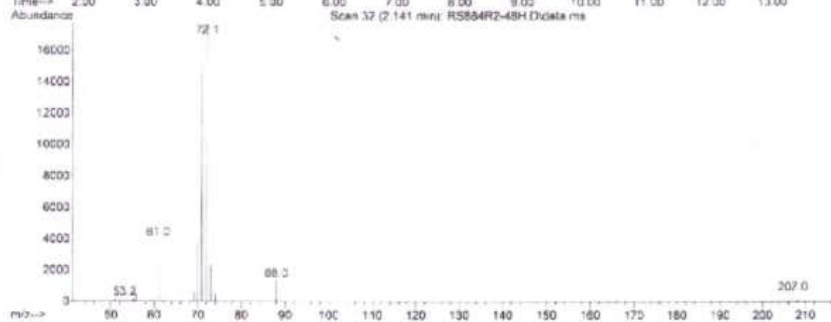

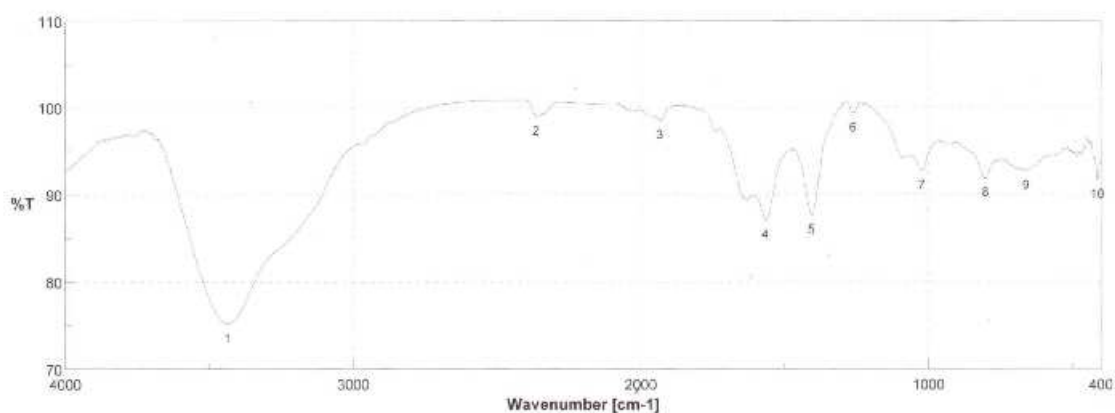

Accumulation: 16  
 Zero Filling: ON  
 Gain: Auto (4)  
 Date/Time: 8/23/2011 3:02PM  
 Operator:  
 File Name: Memory#4  
 Sample Name: Background  
 Comment:  
 Resolution: 4 cm-1  
 Apodization: Cosine  
 Scanning Speed: Auto (2 mm/sec)  
 Update: 8/23/2011 3:06PM

| No. | cm-1    | %T      |
|-----|---------|---------|-----|---------|---------|-----|---------|---------|-----|---------|---------|-----|---------|---------|
| 1   | 3436.63 | 75.1545 | 2   | 2964.3  | 98.981  | 3   | 1632.29 | 98.527  | 4   | 1533.84 | 87.0687 | 5   | 1407.78 | 87.6438 |
| 6   | 1262.18 | 99.3812 | 7   | 1023.05 | 92.7278 | 8   | 801.278 | 91.8882 | 9   | 660.5   | 82.7341 | 10  | 412.892 | 91.7039 |

RS 875R (Black solid)

IR of solid (black) material recovered after reaction

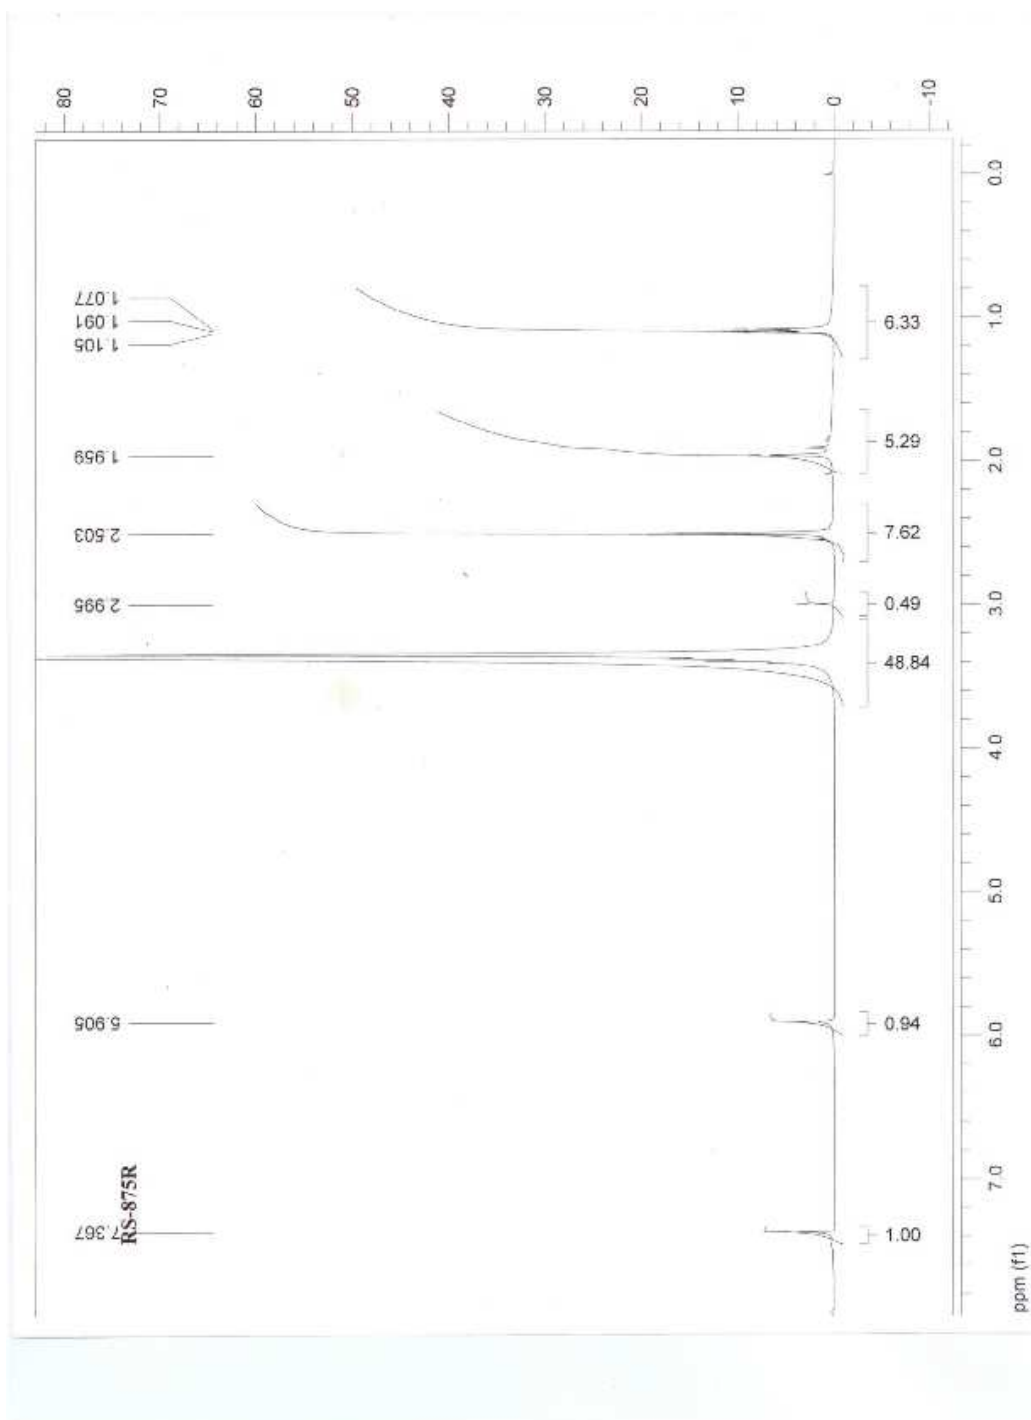

<sup>1</sup>H-NMR of solid (black) material recovered after reaction

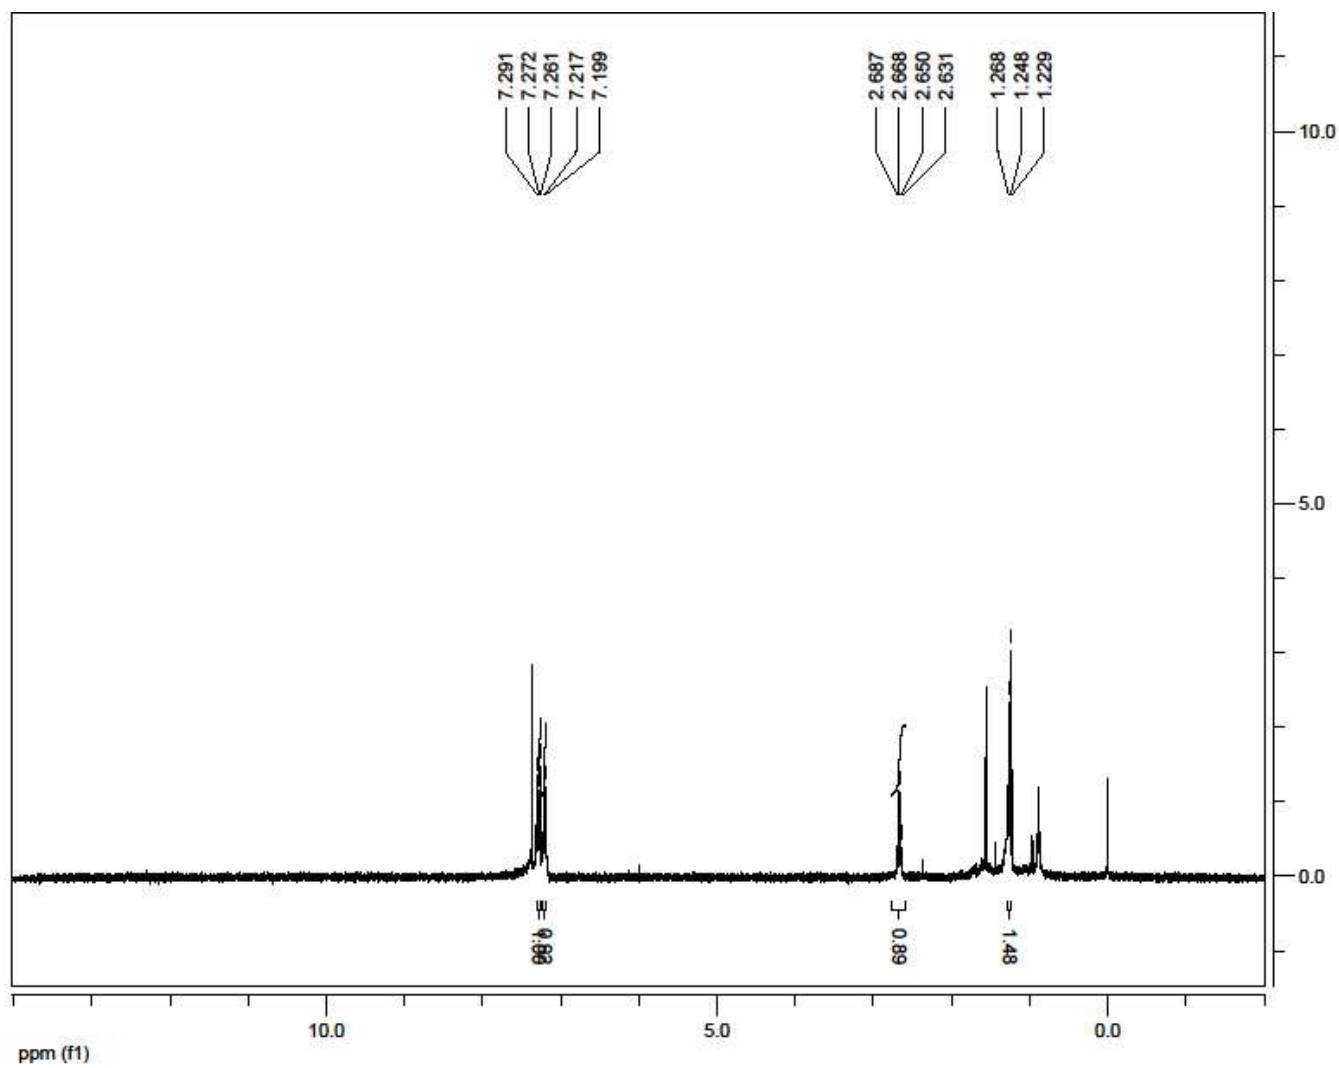

$^1\text{H}$ -NMR of ethyl benzene

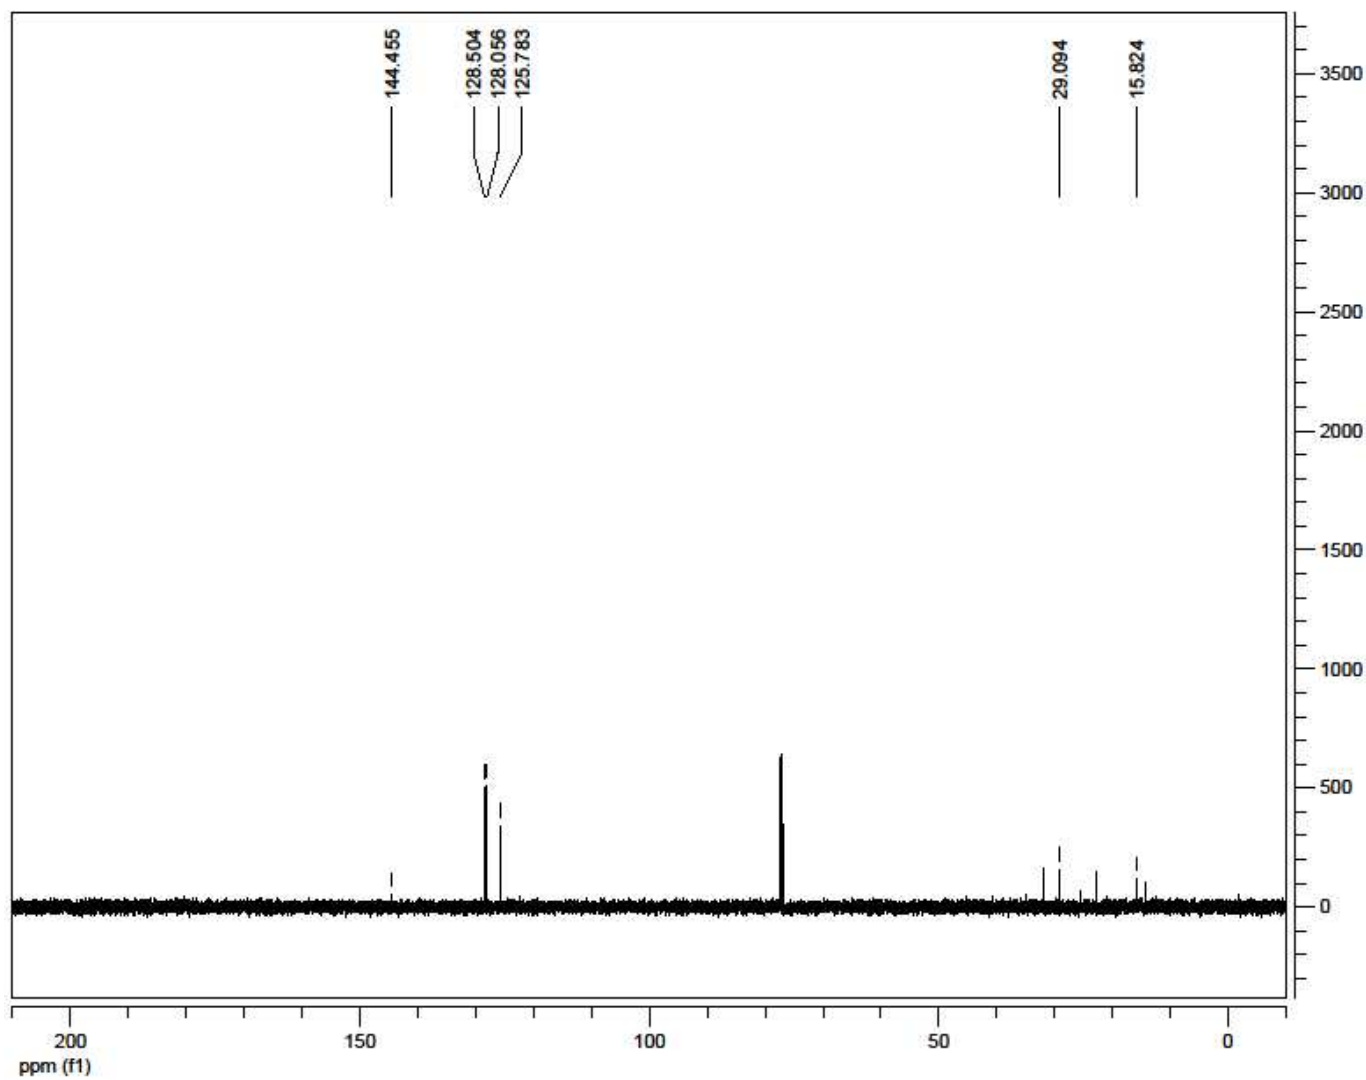

$^{13}\text{C}$ -NMR of ethyl benzene

File : C:\msdchem\1\METHODS\Amination1.M\RS906-8H.D  
Operator : R8  
Acquired : 23 Dec 2010 17:11 using AcqMethod Amination1.M  
Instrument : 5975C  
Sample Name: RS906-8H  
Misc Info : DODH of ethanediol with Ru powder  
Vial Number: 1

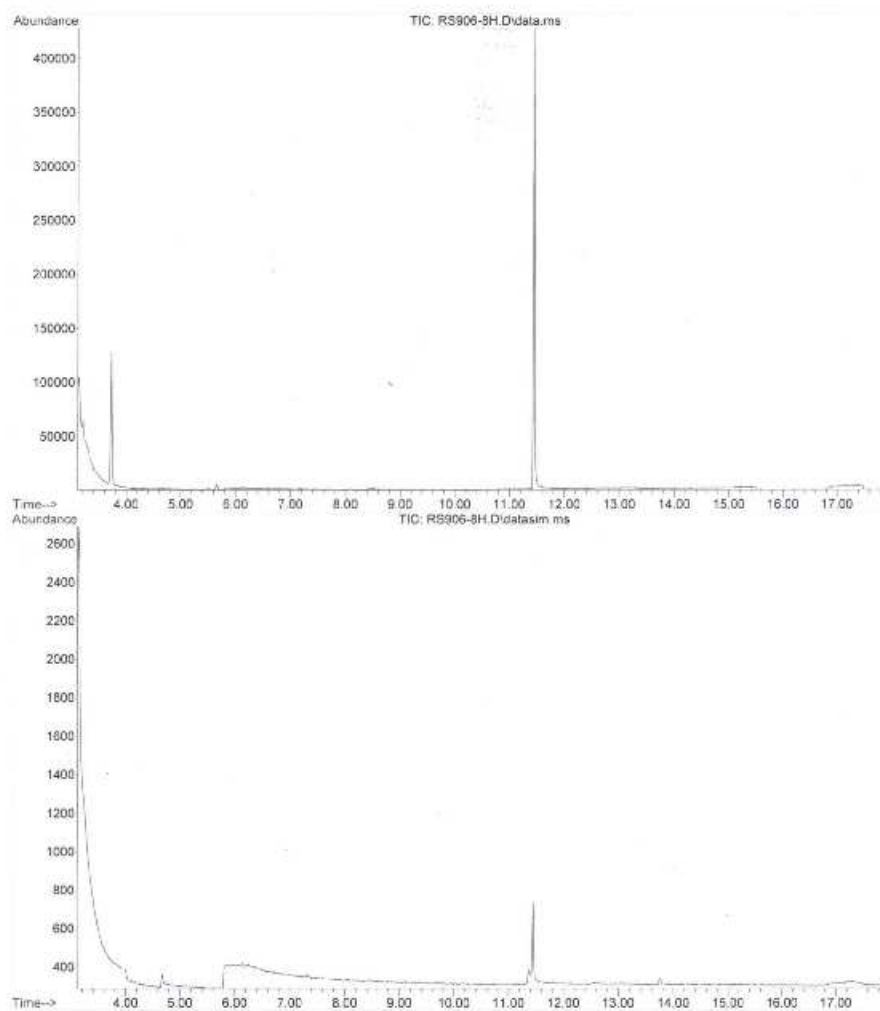

Catalytic DODH of 1-phenyl-1,2-ethanediol with ruthenium-powder
